# Supplementary figures and images for: First-order visual interneurons distribute distinct contrast and luminance information across ON and OFF pathways to achieve stable behavior
Source: eLife journal article supplement (doi:10.7554/elife.74937), 2022-03-09

A

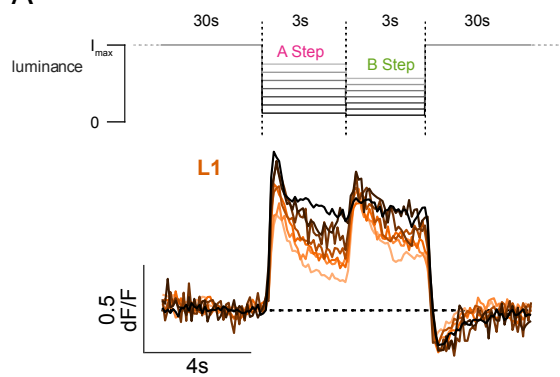

B

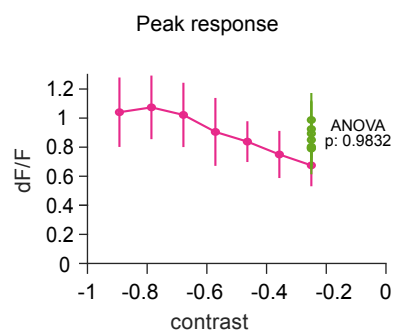

C

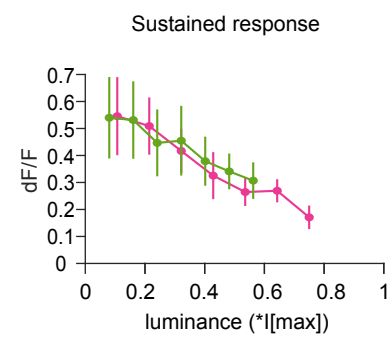

Supplement: supp [file elife-74937-supp-v1.zip]

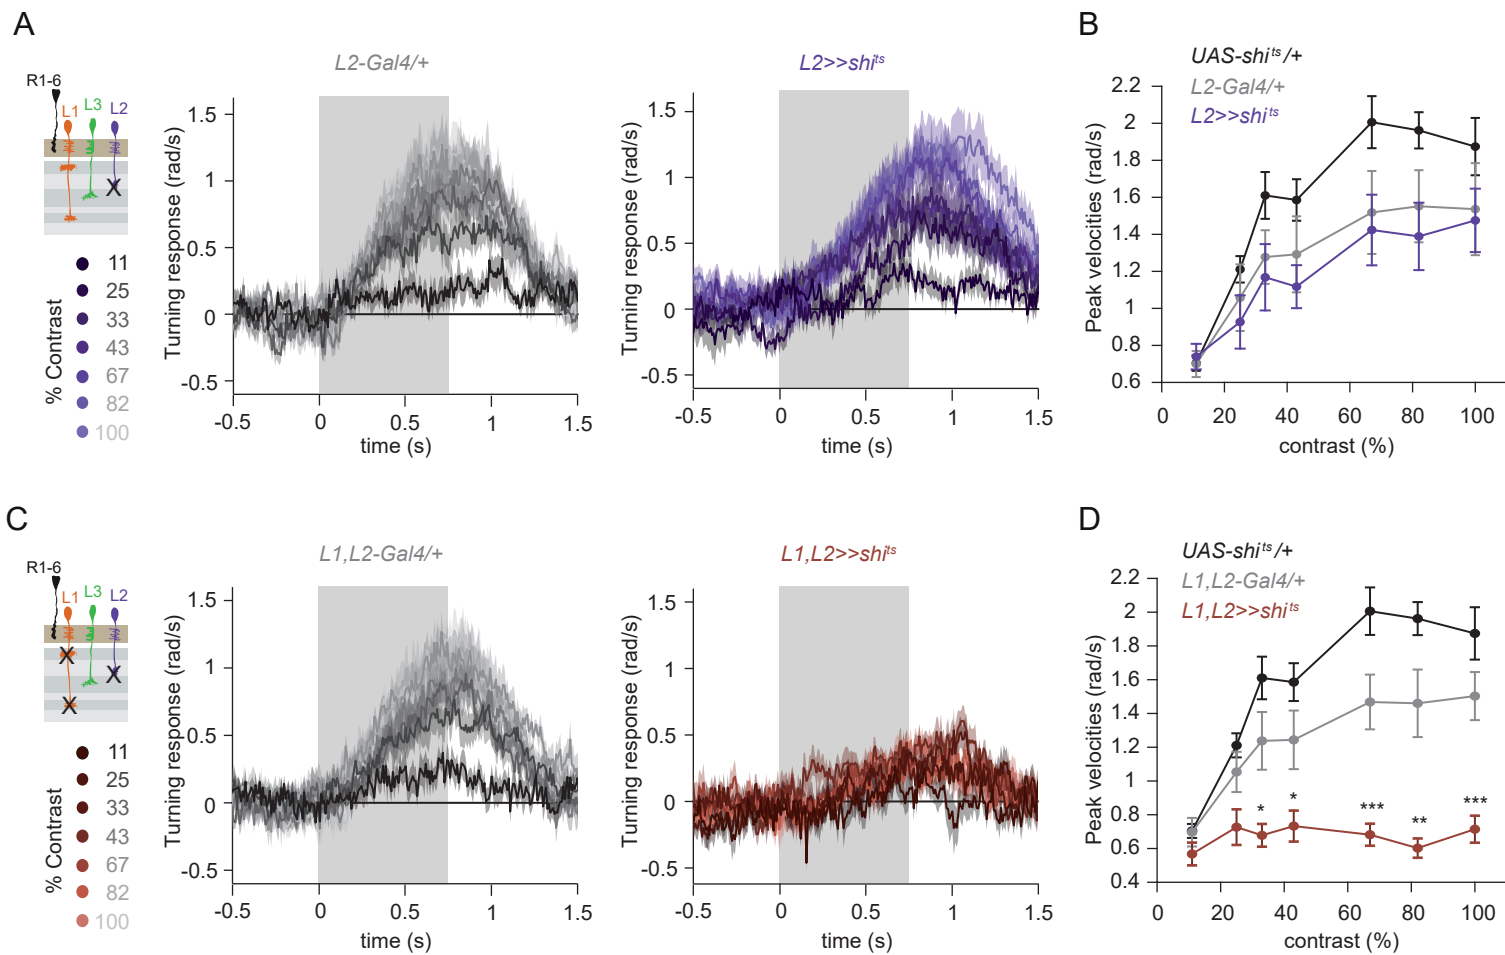

Supplement: supp [file elife-74937-supp-v1.zip]

A

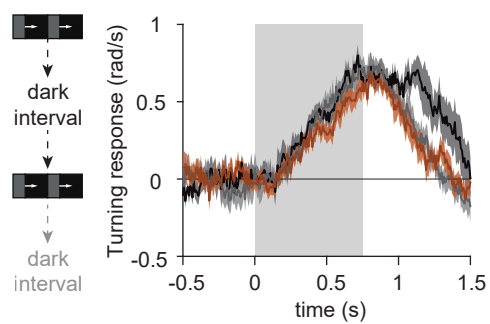

B

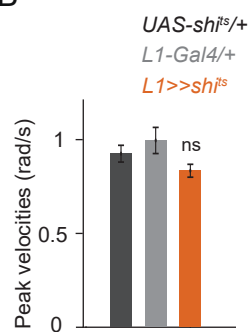

C

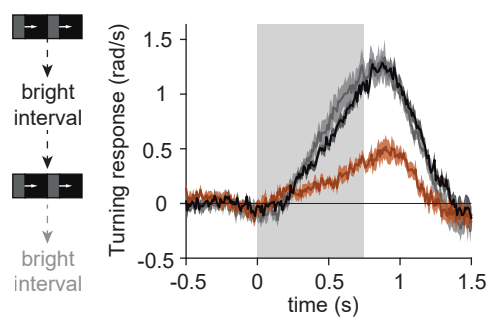

D

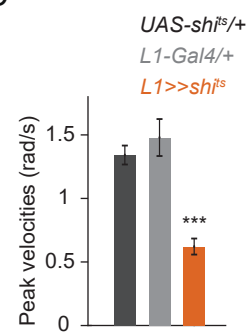

Supplement: supp [file elife-74937-supp-v1.zip]
